# Supplementary material
Source: PubMed Central journal article supplement (PMC3859238)
Supplement: NIHMS535141-supplement-Supplementary_Tables.pdf [file NIHMS535141-supplement-Supplementary_Tables.pdf]

eTable 1. Baseline proportion of LD peptides\*

| Marker             | Normal Cognition |             | MCI        |            |
|--------------------|------------------|-------------|------------|------------|
|                    | E4-              | E4+         | E4-        | E4+        |
| %LD A $\beta$ 42†  | 49.9 (6.2)       | 54.5 (11.2) | 56.6 (5.6) | 82.6 (9.1) |
| %LD A $\beta$ 40 ‡ | 64.9 (5.2)       | 56.5 (9.4)  | 72.4 (4.9) | 93 (7.7)   |

Abbreviations: A $\beta$ ,  $\beta$ -amyloid peptide; E4-, negative for  $\epsilon$ 4 allele; E4+, positive for  $\epsilon$ 4 allele; LD, lipid depleted; MCI, mild cognitive impairment.

\*Calculated as means (SEM), [LD protein/total protein]×100.

†Levels in MCI E4+ subjects were greater than in normal cognition E4- subjects and MCI E4- subjects ( $P<.05$ ). Levels in MCI E4+ subjects were greater than in normal cognition E4+ subjects ( $P=.06$ ).

‡Levels in MCI E4+ subjects were greater than in the other 3 groups ( $P<.05$ ).

eTable 2. Percentage change in LD peptides from diet intervention\*

| Marker $\Delta$                 | Low Diet    | High Diet   |
|---------------------------------|-------------|-------------|
| LD A $\beta$ 42, % <sup>†</sup> | -17.3 (7.3) | -2.7 (6.9)  |
| LD A $\beta$ 40, %              | -13.4 (6.5) | 4.8 (5.9)   |
| LD ApoE, %                      | 1.8 (2.9)   | 3.5 (2.9)   |
| LD ApoE, ng/mL <sup>‡</sup>     | 40.8 (24.7) | -4.1 (25.2) |

Abbreviations: A $\beta$ ,  $\beta$ -amyloid peptide; ApoE, apolipoprotein E; LD, lipid depleted.

\*Mean (SEM) change (week 4 minus week 0) for LD A $\beta$  and ApoE. The Low diet (low levels of saturated fat and glycemic index) decreased LD A $\beta$ 42 slightly more than the High diet (high levels of saturated fat and glycemic index) ( $P=.16$ ). Changes in %D ApoE, and LD ApoE were not significant.

<sup>†</sup>The Low diet decreased whereas High diet increased LD A $\beta$ 40 ( $P<.05$ ).

<sup>‡</sup>Controlled for change in total ApoE protein level.
